# Supplementary material
Source: PubMed Central journal article supplement (PMC7085253)
Supplement: DB190831SupplementaryData.pdf [file DB190831SupplementaryData.pdf]

## SUPPLEMENTARY DATA

### Online-only Supplemental Materials

#### Data collection

Genotype study data was collected from publicly available repositories, with exception of the CHOP-McGill CaCo and CHOPTDT studies (provided by C.P.<sup>1</sup>)(**Table S1**). Publicly available genotype data was obtained from the following sources: dbGaP for cohorts GoKinD ([https://www.ncbi.nlm.nih.gov/projects/gap/cgi-bin/study.cgi?study\\_id=phs000088.v1.p1](https://www.ncbi.nlm.nih.gov/projects/gap/cgi-bin/study.cgi?study_id=phs000088.v1.p1)), EDIC-DCCT ([https://www.ncbi.nlm.nih.gov/projects/gap/cgi-bin/study.cgi?study\\_id=phs000086.v2.p1](https://www.ncbi.nlm.nih.gov/projects/gap/cgi-bin/study.cgi?study_id=phs000086.v2.p1)), and T1DGC ([http://www.ncbi.nlm.nih.gov/projects/gap/cgi-bin/study.cgi?study\\_id=phs000180.v1.p1](http://www.ncbi.nlm.nih.gov/projects/gap/cgi-bin/study.cgi?study_id=phs000180.v1.p1)); WTCCC for cohorts Type 1 Diabetes, Hypertension, Type 2 Diabetes, and Bipolar Disorder, 1958 Birth Cohort, and UK Blood Service<sup>2</sup>; the TwinsUK Resource for the TwinsUK cohort (<http://www.twinsuk.ac.uk/data-access/>). In total we collected genotype data for 9,684 cases and 17,153 controls. Specifically, in the 3,173 type 1 diabetes cases genotyped on the Affymetrix platform, we included 1,173 subjects from the Genetics of Kidneys in Diabetes Study (GoKinD) and 2,000 from the Wellcome Trust Cases Control Consortium (WTCCC). These were then compared with 5,998 similarly genotyped controls from WTCCC, and specifically 1,999 subjects from the type 2 diabetes (T2D) study, 2001 subjects from the hypertension (HT) study and 1,998 individuals from the bipolar disorder (BD) study. Among the 6,511 type 1 diabetes cases genotyped on Illumina arrays, 514 individuals were from McGill University, 483 from The Children's Hospital of Philadelphia (CHOP), 1,385 from The Diabetes Control and Complications Trial – Epidemiology of Diabetes Interventions and Complications (DCCT-EDIC) cohort, and 4,129 from the Type 1 Diabetes Genetics Consortium (T1DGC). These were compared with 11,155 similarly genotyped controls recruited from Twins UK (n=3,461), and two WTCCC studies (2,930 individuals from the 1958 British Cohort (58BC) and 2,737 individuals from the UK Blood Service sample (NBS) respectively). Genotyping was performed using Affymetrix or Illumina arrays for 3,173 or 6,511 cases and 5,998 or 11,155 controls, respectively.

#### Genotype quality control

Genotype quality assessment was performed according to published guidelines<sup>3</sup>. Quality control was conducted in the following manner: (1) convert position of array markers to human genome build version hg19/GRCh37, (2) remove individuals with problematic sex assignment, (3) remove individuals with genotype missingness > 0.05 and heterozygosity > 3 s.d., (4) remove individuals with proportion identity-by-descent > 0.1875, and (5) removed array makers with minor allele frequency of < 0.01, missingness > 0.05, and Hardy-Weinberg equilibrium p-value < 0.00001. In addition, the CHOPTDT cohort from CHOP-McGill consists of case-parent trios, thus we retained the single type 1 diabetes case per trio for association analysis as the model used does not adjust for familial relatedness. Count of remaining individuals per cohort is listed in **Table S1**. Following the aforementioned quality control, all individuals from cohorts genotyped by the same array manufacturer were merged into a single data set, retaining only the array markers that were in common between all cohorts being merged (337,727 and 456,168 markers for Affymetrix- and Illumina-based arrays, respectively).

#### Assessment of population stratification

Population stratification was assessed using EIGENSTRAT version 6.0.1<sup>4</sup>. This assessment was performed for the merged cohorts genotyped by the same array manufacturer and that passed quality control and removal of related individuals (CHOP-McGill only) (**Table S1**, N(total)=25,063). SNPs used as input into EIGENSTRAT included those that pass the aforementioned genotype quality control, followed by further filtering in the following manner: (1) remove markers with genotype missingness >

## SUPPLEMENTARY DATA

0.05 and Hardy-Weinberg  $p$ -value  $< 0.00001$ , (2) remove markers with  $p$ -value  $< 0.00001$  of Fisher's exact test of association between missingness and case/control status, and (3) remove markers with  $> 0.2$  difference in minor allele frequency between cases and controls and (4) prune for markers in approximate linkage equilibrium ( $r^2 < 0.1$ ), resulting in a set of 52,598 and 99,742 markers for the Affymetrix- and Illumina-based data sets. Analysis using EIGENSTRAT was performed using the default parameters and identified 268 and 545 individuals as outliers from the Affymetrix- and Illumina-based arrays, respectively; that is those individuals that have a standard deviation of  $> 6$  sd from one or more of the top 10 principal components. The top 10 principal components from this analysis were used in the GWAS to adjust for population stratification.

The total count of samples remaining is 24,250, with 2,903/5,678 cases/controls and 6,093/9,576 cases/control for the Affymetrix- and Illumina-based data sets, respectively.

To assess the outlier removal of EIGENSTRAT we performed an additional principal component analysis by combining the type 1 diabetes genotype data with data from 1000 Genomes phase 3 ( $N=2,504$ ). For each genotype platform, we merged the marker data used in the EIGENSTRAT analysis to a matched set of markers from all 1000 Genomes phase 3 individuals. Analysis using the PLINK 2 "--pca approx." command was performed to obtain the top 20 principal components. Results of this analysis for the entire Affymetrix or Illumina cohorts, separately in cases and controls, or by individual cohort are depicted in **Figure S2**, and demonstrate that the outliers removed by EIGENSTRAT lie outside the 1000 Genomes European super-population, whereas the inliers largely overlap or are in close proximity to the European super-population.

### Genotype Imputation

Genotype imputation was performed using the Sanger Imputation Service<sup>5</sup>. Imputation was performed for all individuals from cohorts genotyped using the same manufacturer, that passed quality control, removal of related individuals (CHOP-McGill only) and assessment for population stratification. Genotype data was prepared for imputation using the HRC-checking tool (<http://www.well.ox.ac.uk/~wrayner/tools/>), and resulted in 276,940 and 454,944 SNPs being used as input for imputation from the Affymetrix- and Illumina-based cohorts, respectively. Genotype data was pre-phased by the Sanger Imputation Service using EAGLE<sup>6</sup>, following by imputation using PBWT<sup>7</sup> to the Haplotype Reference Consortium (r1.1). The imputation process resulted in 39,131,578 autosomal SNPs.

### GWAS of type 1 diabetes by genotyping platform

Genome-wide association analysis was performed using SNPTEST version 2.5.2, where we tested the additive effect of each imputed probability allele (GP field in VCF format) on type 1 diabetes status using the 'newml' method. The GWAS was performed for all individuals from cohorts genotyped using the same manufacturer, that passed quality control, removal of related individuals (CHOP-McGill only) and assessment for population stratification ( $N(\text{total}) = 24,250$ ). The GWAS was performed separately for all individuals from the Affymetrix ( $N(\text{cases}) = 2,903$  and  $N(\text{controls}) = 5,678$ ) and Illumina ( $N(\text{cases}) = 6,093$  and  $N(\text{controls}) = 9,576$ ) genotyped cohorts using type 1 diabetes case/control status as the phenotype, as well as the top 10 principal components from the assessment of population stratification. For computational efficiency the genome-wide genotype data was split into 7,212 chunks of 400kb and run in parallel on a compute cluster consisting of nodes with 20-cores and 128GB of memory.

## SUPPLEMENTARY DATA

### Meta-analysis of the GWAS

Meta-analysis of the effect estimates from the Affymetrix and Illumina GWAS analyses was performed using METAL version 2011-03-25<sup>8</sup>. We used as input all computed GWAS summary statistics derived from the analysis of the Affymetrix and Illumina genotyped cohorts. Meta-analytic results were then filtered in the following manner: (1) comprised of summary statistics from both the Affymetrix- and Illumina-based GWAS, (2) had a minor allele frequency in controls  $> 0.005$ , and (3) had an INFO imputation quality  $> 0.3$ . This resulted in a total of 9,061,522 SNPs used for further analyses.

### Determining independent loci

Conditionally independent loci from the meta-analytic summary statistics were identified using GCTA-COJO version 1.91.1<sup>8</sup>. Because meta-analysis consisted of both Affymetrix and Illumina genotyped cohorts, we merged the imputed genotype data derived from both genotype platforms using bcftools and used the resulting dataset as the reference panel for selecting independently associated SNPs with GCTA-COJO, using the following parameters: `--cojo-wind 20000 --cojo-slet --cojo-collinear 0.9 --cojo-p 1.2e-8`. Analysis using GCTA-COJO resulted in 107 conditionally independent loci (**Table S2**) at  $p$ -value  $< 1.2 \times 10^{-8}$ . We further excluded independent SNPs according to the following exclusion criteria: (1) overlapping the major histocompatibility complex locus (chr6:27,477,797-34,448,354, hg19/GRCh37), (2) meta-analytic or conditional  $p$ -value  $> 1.2 \times 10^{-8}$ , and (3) supported by fewer than 3 SNPs within 40 kb with discovery  $p$ -value  $< 0.0001$ . This resulted in a total of 27 independent loci used for further analysis.

### Replication of Discovery Association Signals

#### Data sources

Replication of discovery association signals was performed by combining *de novo* genotyping of type 1 diabetes cases from a sib-pair cohort ( $N=5,501$ ) with 10,000 randomly selected controls from UK Biobank. DNA samples for type 1 diabetes cases were provided by C.P., and 4,542 of 5,501 individuals were genotyped using a Affymetrix CIDR 6K array (5,651 SNPs) as part of a past study<sup>1</sup>, which will be used to account for population stratification to UK Biobank controls (described below). We removed individuals with  $> 10\%$  genotype missingness on the Affymetrix CIDR 6K array, resulting in 4,466 type 1 diabetes cases used for population stratification analysis with UK Biobank controls.

We selected a total of 8 conditionally independent SNPs for replication analysis (**Table S4**): 2 SNPs at known loci; the INS locus and a variant of low allele frequency at TYK2, 2 novel SNPs with  $MAF > 0.05$ , and all 4 novel low-frequency SNPs ( $MAF < 0.05$ ). *De novo* genotyping of these SNPs on the replication type 1 diabetes cases was performed using SNP assays custom designed by LGC Genomics using the KASP genotyping. KASP genotyping assays are based on competitive allele-specific PCR and enable bi-allelic scoring of single nucleotide polymorphisms (SNPs) and insertions and deletions (Indels) at specific loci. Assays were deemed to be working successfully if clusters were distinct and call rates were consistently high. The data is automatically quality control checked on a per SNP basis. No Template Controls (NTCs) are included on each plate to enable the detection of contamination or non-specific amplification. For further information, see <https://biosearch-cdn.azureedge.net/assetsv6/kasp-explanation-fact-sheet.pdf> and <https://www.biosearchtech.com/support/resources/starting-a-genotyping-project/genotyping-laboratory-workflow>

## SUPPLEMENTARY DATA

### *Assessment for population stratification*

Population stratification analysis was conducted using 4,466 type 1 diabetes cases and 10,000 randomly selected controls from UK Biobank. SNPs used were those genotyped for the type 1 diabetes cases on the Affymetrix CIDR 6k array (N=5,651). Prior to analysis of population stratification, we performed the following SNP quality filtering: For type 1 diabetes cases, we retained array genotyped SNPs with missingness > 0.1, MAF < 0.05, and discovery association p-value < 0.1, resulting in a total of 3,997 SNPs. This was followed by extraction of these 3,997 variants from UK Biobank imputed genotype data where we retained SNPs with INFO > 0.9, Hardy-Weinberg equilibrium p-value > 0.000001, and had < 10% difference in MAF to the type 1 diabetes cases. This resulted in a total of 3,759 SNPs used for population stratification analysis. The top 20 principal components from population stratification analysis was obtained from PLINK 2.0 using the method developed by Galinsky et al.<sup>9</sup>. K-means clustering of the top 4 principal components was used to obtain the largest subset of ancestrally homogeneous individuals (Ncases=4,329 and Ncontrols=9,543). The plots of the first two principal components of the entire replication cohort, and separately of replication cases and of replication controls were then projected and compared to that of a set of 2,504 individuals from 1000 Genomes phase 3 (**Figure S3**). Association analysis on the subset of ancestrally homogeneous individuals (N=13,872) was performed by adjusting for familial relatedness in the type 1 diabetes case sib-pairs by generating a standardized relatedness matrix using GEMMA 0.96 followed by using this kinship matrix when performing association analysis using the binomial method in GMMAT<sup>10</sup>.

### **Fine-mapping**

Putatively causal SNPs were identified using FINEMAP version 1.3<sup>11</sup> for a 500 kb region spanning each of the 27 independent loci. Prior to analysis with FINEMAP, correlation matrices for each genomic region was generated using (n=24,250) LDSTORE<sup>12</sup>. FINEMAP was run with default parameters except for the following: --n-causal-snps 20, --prior-std 0.0242, --group-snps, --corr-config 0.9, and --corr-group 0.9. We post-processed the FINEMAP results to obtain a list of putatively causal SNPs that are LD-independent at the FINEMAP specified parameters (--corr-config 0.9, and --corr-group 0.9) and have a log<sub>10</sub> Bayes factor > 2. These putatively causal SNPs are provided in **Table S6**. **Figure 3** and **Figure S4** depict the FINEMAP results for the 6 replicated loci.

### **In-silico functional annotation of GWAS loci**

In-silico annotation of genomic loci was conducted using the following publicly available resources in reference to human genome build hg19/GRCh37. From the UCSC Genome Browser (genome.ucsc.edu) used the following annotation tracks: “UCSC Genes”, “H3K27Ac Mark on 7 cell lines from ENCODE”, “DNaseI hypersensitivity clusters in 125 cell types from ENCODE (v3)”, “chromHMM tracks from Roadmap”, “Transcription Factor ChIP-seq (161 factors) from ENCODE with Factorbook Motifs”, and “Simple nucleotide polymorphisms (dbSNP 150) Found in >1% of Samples”. For the topological associating domain (TAD) analysis, we used the Juicebox tool from the Aiden lab (aidenlab.org/juicebox/) to obtain Hi-C interaction plots using the “4DN Dekker Lab H1 hESC combined” map at 5kb resolution and balanced normalization.

### **In vitro experiments**

#### **Murine T-cell experiments**

##### *Mice*

C57BL/6.Foxp3GFP reporter mice were bred and housed at the RI-MUHC under specific pathogen free conditions and used in accordance with the institution’s animal research practices. Both female and male

## SUPPLEMENTARY DATA

mice were used, and all mice were used between 8-12 weeks of age. The CD4<sup>+</sup> T cells were isolated from lymph nodes and spleens from C57BL/6.Foxp3GFP reporter mice<sup>13</sup>.

### *T Cell Purification*

Lymph nodes and spleens from C57BL/6.Foxp3GFP reporter mice were dissociated using glass slides and treated ACK lysis buffer to remove red blood cells. Cells were then filtered through 70  $\mu$ m nylon mesh filters and resuspended in complete cRPMI-1640 containing 10% FBS (Wisent). CD4<sup>+</sup> T cells were isolated by staining cells with Miltenyi CD4-positive selection beads and separated using a Miltenyi AutoMACS. The CD4-negative fraction was kept for use as antigen presenting cells. The CD4-positive fraction was further stained for CD4 (clone: RM4-5, eBioscience) and cells were sorted on a BD FACSAria to obtain CD4<sup>+</sup>GFP<sup>-</sup> (Foxp3<sup>-</sup>) TEFF cells.

### *In Vitro Assays*

Cytokine secretion assays were performed using total CD4<sup>+</sup> T cells activated using soluble  $\alpha$ -CD3 (BD Biosciences) and co-cultured with irradiated antigen presenting cells in the presence or absence of Closantel (Abcam) at titrated doses (10 $\mu$ M and 20 $\mu$ M). Cytokine secretion was assessed 72 hours post-activation with PMA and Ionomycin (SigmaAldrich), and Monensin (BD Golgi Stop) for 3 hours prior to intracellular staining cells for flow cytometry.

### *Flow Cytometry*

Cells were stained with Fixable Viability Dye (eBioscience) for 15 min at 4C prior to extracellular staining. Cells were then stained for CD4 (clone: GK1.5) and CD25 (clone: PC61.5) for 30 min at 4C. As for the antibodies, they were all used at a concentration of 1  $\mu$ L/ 100 $\mu$ L and all staining carried out in 50  $\mu$ L in a 96 v-well plate. Cells were fixed using Foxp3 fixation buffer (eBioscience) for 30 min, prior to being intracellularly stained in permeabilization buffer (eBioscience) containing antibodies for IFN $\gamma$  (clone: XMG1.2) or IL-2 (clone: JES6-1A12). All antibodies were purchased from eBioscience. Cells were acquired using a BD Fortessa X-20 flow cytometer and results were analysed using Treestar FlowJo (v10).

## References

1. Hakonarson, H. *et al.* A genome-wide association study identifies KIAA0350 as a type 1 diabetes gene. *Nature* **448**, 591-4 (2007).
2. Wellcome Trust Case Control, C. Genome-wide association study of 14,000 cases of seven common diseases and 3,000 shared controls. *Nature* **447**, 661-78 (2007).
3. Anderson, C.A. *et al.* Data quality control in genetic case-control association studies. *Nat Protoc* **5**, 1564-73 (2010).
4. Patterson, N., Price, A.L. & Reich, D. Population structure and eigenanalysis. *PLoS Genet* **2**, e190 (2006).
5. McCarthy, S. *et al.* A reference panel of 64,976 haplotypes for genotype imputation. *Nat Genet* **48**, 1279-83 (2016).
6. Loh, P.R. *et al.* Reference-based phasing using the Haplotype Reference Consortium panel. *Nat Genet* **48**, 1443-1448 (2016).
7. Durbin, R. Efficient haplotype matching and storage using the positional Burrows-Wheeler transform (PBWT). *Bioinformatics* **30**, 1266-72 (2014).

## SUPPLEMENTARY DATA

8. Willer, C.J., Li, Y. & Abecasis, G.R. METAL: fast and efficient meta-analysis of genomewide association scans. *Bioinformatics* **26**, 2190-1 (2010).
9. Galinsky, K.J. *et al.* Fast Principal-Component Analysis Reveals Convergent Evolution of ADH1B in Europe and East Asia. *Am J Hum Genet* **98**, 456-472 (2016).
10. Chen, H. *et al.* Control for Population Structure and Relatedness for Binary Traits in Genetic Association Studies via Logistic Mixed Models. *Am J Hum Genet* **98**, 653-66 (2016).
11. Benner, C. *et al.* FINEMAP: efficient variable selection using summary data from genome-wide association studies. *Bioinformatics* **32**, 1493-501 (2016).
12. Benner, C. *et al.* Prospects of Fine-Mapping Trait-Associated Genomic Regions by Using Summary Statistics from Genome-wide Association Studies. *Am J Hum Genet* **101**, 539-551 (2017).
13. Fontenot, J.D. *et al.* Regulatory T cell lineage specification by the forkhead transcription factor foxp3. *Immunity* **22**, 329-41 (2005).

SUPPLEMENTARY DATA

Supplementary Figure S1. Study flow-chart

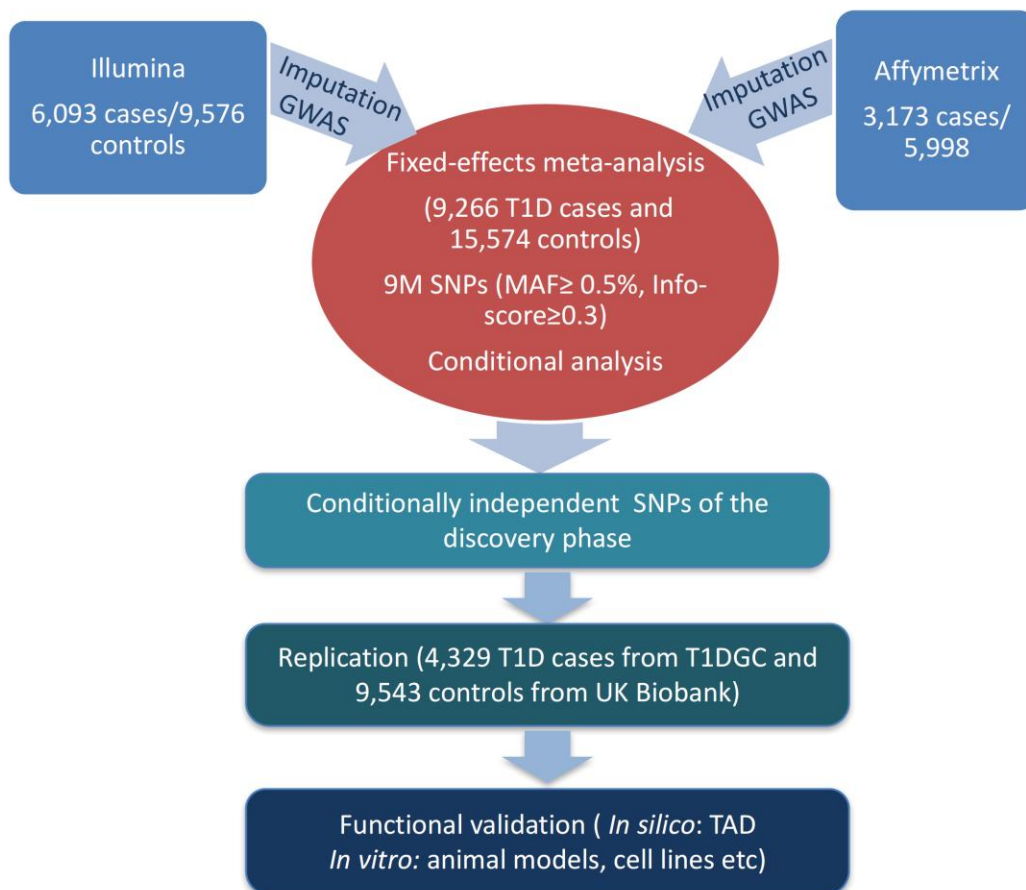

SUPPLEMENTARY DATA

**Supplementary Figure S2. Principal component analysis in Affymetrix-platform genotyped individuals (a) and in Illumina-platform genotyped individuals (b).** The first panel represents comparison of PC1 vs PC2 in 2,504 individuals from the 1000 Genomes phase 3, and serves as a reference. The subsequent panels depict comparisons of PC1 vs PC2 in the entire Affymetrix or Illumina datasets, separately in cases and controls, and in the respective individual cohorts. Grey points are individuals from the type 1 diabetes datasets that were removed due to being outliers in EIGENSTRAT. Pink points are individuals that were retained for GWAS analysis.

**a**

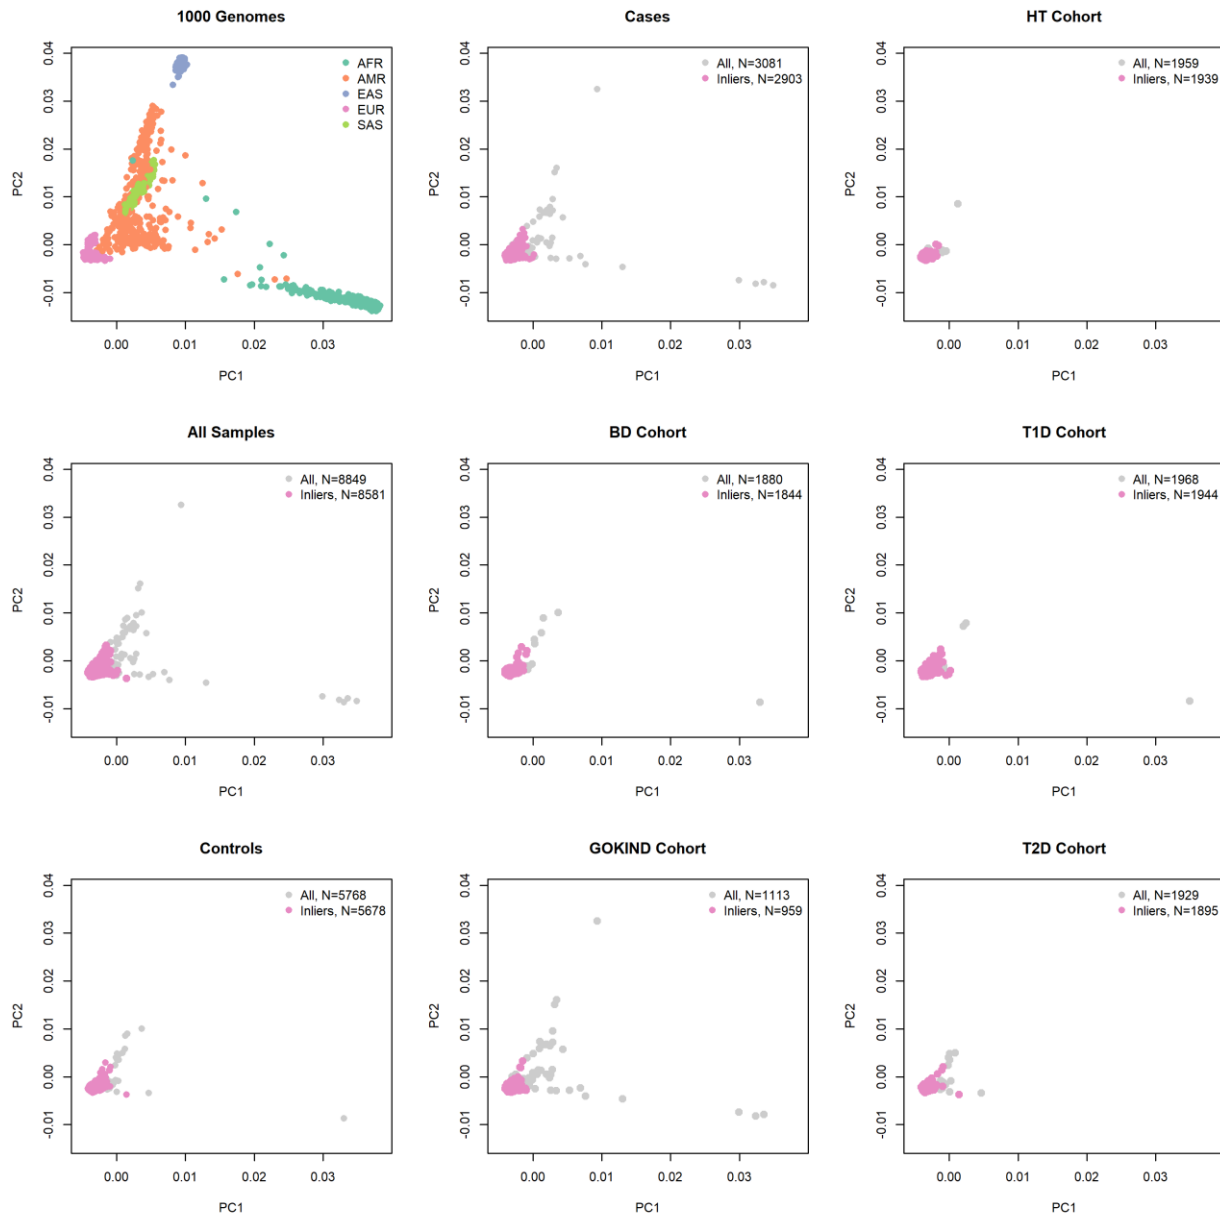



SUPPLEMENTARY DATA

**b**

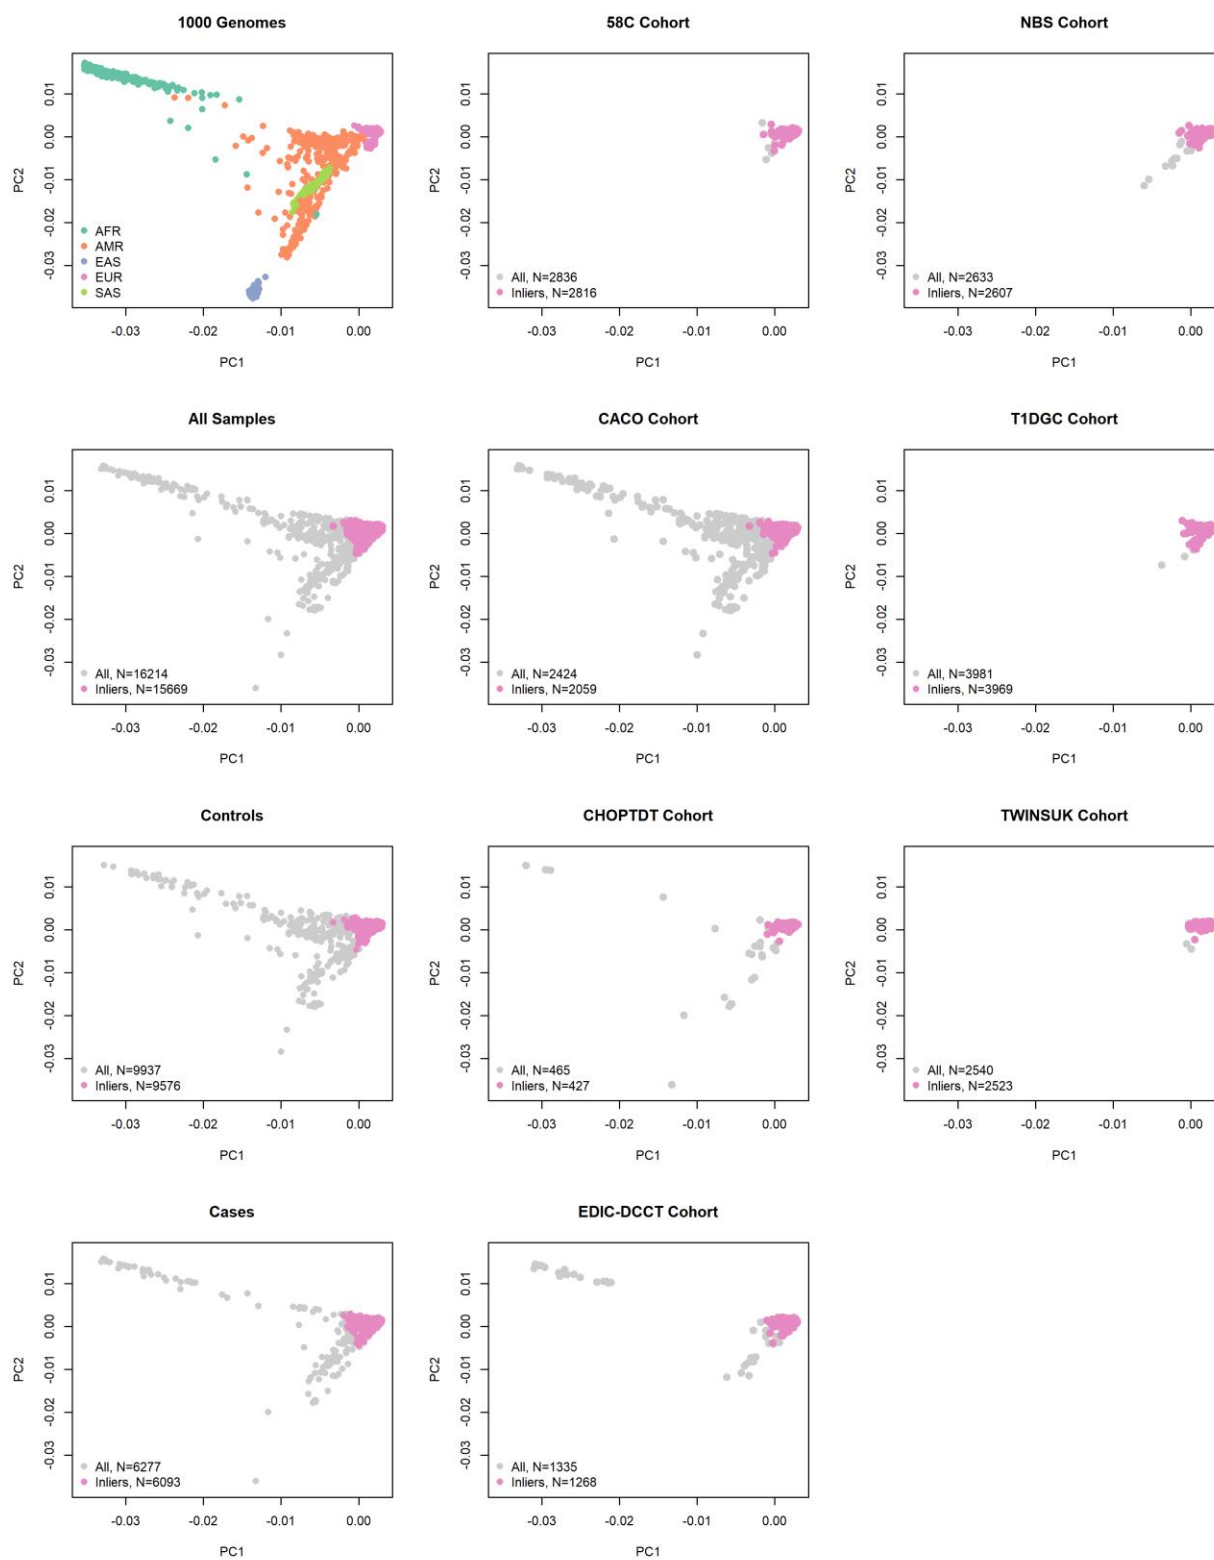

SUPPLEMENTARY DATA

**Supplementary Figure S3. Principal component analysis in the replication cohort.** The first panel depicts comparison of PC1 vs PC2 in 2,504 individuals from the 1000 Genomes phase 3, and serves as a reference. The subsequent panels depict comparisons of the PC1 vs PC2 in the entire replication cohort, and separately in cases (from T1DGC4) and in controls (from random sub-sample of UK Biobank). The set of individuals retained for replication association analyses are depicted in pink, and removed outliers appear in grey.

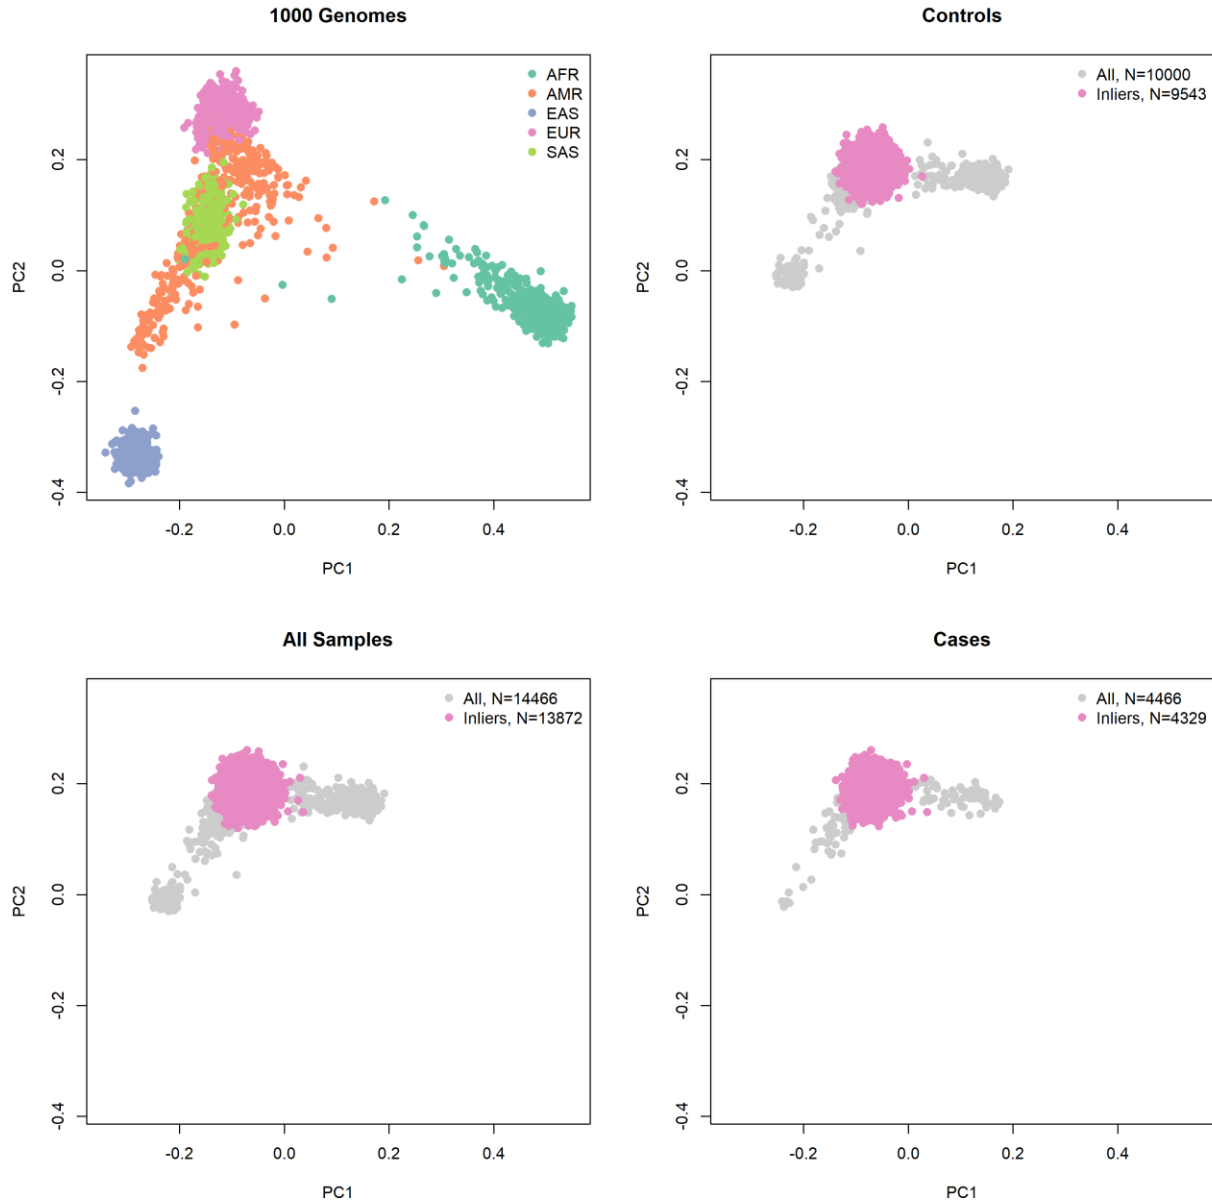

SUPPLEMENTARY DATA

**Supplementary Figure S4. Regional Manhattan and fine-mapping plots for the 5 top variants from replication from Table 1 other than the *STK39* variant.** Top panels depict the results from the discovery meta-analysis of regions centered on the variants. These genetic variants are the lead signals, and are supported by multiple genome-wide suggestive genetic variants. In the bottom panel, statistical fine-mapping of these further loci supports the respective variants as the lead putatively causal genetic variants (yellow ×), accompanied by highly correlated genetic variants with of lower log10 Bayes factor (yellow diamonds).

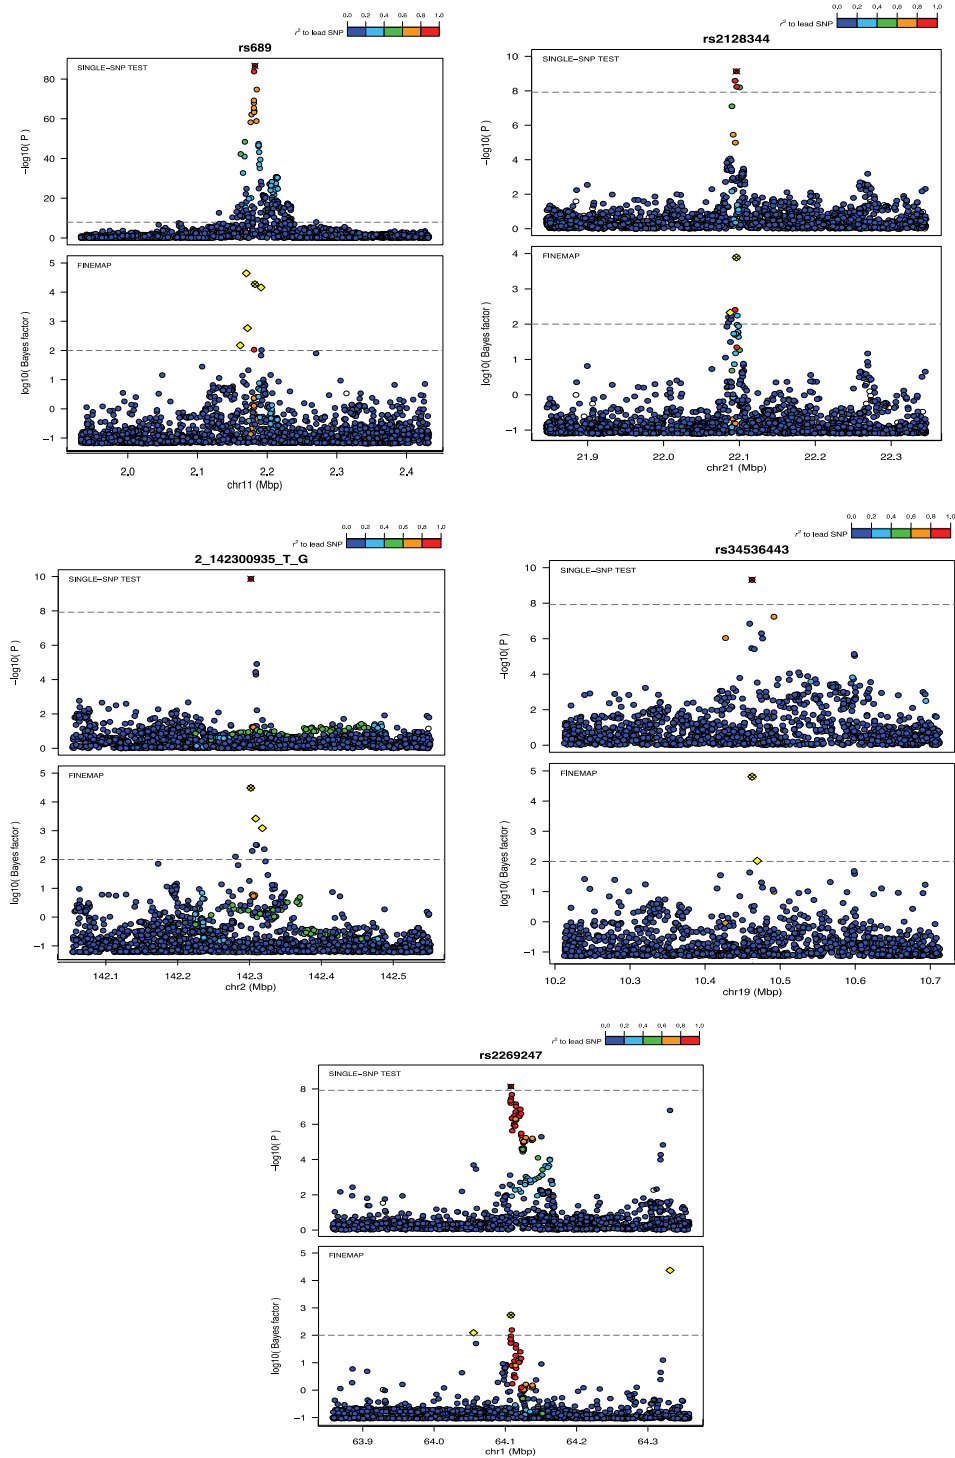

# SUPPLEMENTARY DATA

Table S1. Summary of GWAS discovery cohorts

| Repository       | Study    | Array                    | Pre-QC |          | Post-QC |          | %males in Cases | %males in Controls                                                                                                                                                                                                                                                                                            | study description link |
|------------------|----------|--------------------------|--------|----------|---------|----------|-----------------|---------------------------------------------------------------------------------------------------------------------------------------------------------------------------------------------------------------------------------------------------------------------------------------------------------------|------------------------|
|                  |          |                          | Cases  | Controls | Cases   | Controls |                 |                                                                                                                                                                                                                                                                                                               |                        |
| NIDDK (dbGaP)    | GOKND    | Affymetrix 500K          | 1173   | 0        | 1113    | 0        | 49%             | <a href="https://www.ncbi.nlm.nih.gov/projects/gap/cgi-bin/study.cgi?study_id=phs000088.v1.p1">https://www.ncbi.nlm.nih.gov/projects/gap/cgi-bin/study.cgi?study_id=phs000088.v1.p1</a>                                                                                                                       |                        |
| WTCCC (EGA)      | T1D      | Affymetrix 500K          | 2000   | 0        | 1968    | 0        | 51%             | <a href="http://scholar.google.com/scholar?q=Genome-wide+association+study+of+14%2C000+cases+of+seven+common+diseases+and+3%2C000+shared+controls.++2007">http://scholar.google.com/scholar?q=Genome-wide+association+study+of+14%2C000+cases+of+seven+common+diseases+and+3%2C000+shared+controls.++2007</a> |                        |
| WTCCC (EGA)      | T2D      | Affymetrix 500K          | 0      | 1999     | 0       | 1929     | 58%             | <a href="http://scholar.google.com/scholar?q=Genome-wide+association+study+of+14%2C000+cases+of+seven+common+diseases+and+3%2C000+shared+controls.++2007">http://scholar.google.com/scholar?q=Genome-wide+association+study+of+14%2C000+cases+of+seven+common+diseases+and+3%2C000+shared+controls.++2007</a> |                        |
| WTCCC (EGA)      | HT       | Affymetrix 500K          | 0      | 2001     | 0       | 1959     | 40%             | <a href="http://scholar.google.com/scholar?q=Genome-wide+association+study+of+14%2C000+cases+of+seven+common+diseases+and+3%2C000+shared+controls.++2007">http://scholar.google.com/scholar?q=Genome-wide+association+study+of+14%2C000+cases+of+seven+common+diseases+and+3%2C000+shared+controls.++2007</a> |                        |
| WTCCC (EGA)      | BD       | Affymetrix 500K          | 0      | 1998     | 0       | 1880     | 37%             | <a href="http://scholar.google.com/scholar?q=Genome-wide+association+study+of+14%2C000+cases+of+seven+common+diseases+and+3%2C000+shared+controls.++2007">http://scholar.google.com/scholar?q=Genome-wide+association+study+of+14%2C000+cases+of+seven+common+diseases+and+3%2C000+shared+controls.++2007</a> |                        |
| NIDDK (dbGaP)    | EDC-DCCT | Illumina HumanHap550     | 1385   | 0        | 1335    | 0        | 53%             | <a href="https://www.ncbi.nlm.nih.gov/projects/gap/cgi-bin/study.cgi?study_id=phs000086.v2.p1">https://www.ncbi.nlm.nih.gov/projects/gap/cgi-bin/study.cgi?study_id=phs000086.v2.p1</a>                                                                                                                       |                        |
| NIDDK (dbGaP)    | T1DGC    | Illumina HumanHap550     | 4129   | 0        | 3981    | 0        | 53%             | <a href="https://www.ncbi.nlm.nih.gov/projects/gap/cgi-bin/study.cgi?study_id=phs000180.v1.p1">https://www.ncbi.nlm.nih.gov/projects/gap/cgi-bin/study.cgi?study_id=phs000180.v1.p1</a>                                                                                                                       |                        |
| CHOP-McGill      | CACO     | Illumina HumanHap550     | 514    | 2027     | 496     | 1928     | 55%             | <a href="https://scholar.google.com/scholar?q=A+genome-wide+association+study+identifies+KIAA0350+as+a+type+1+diabetes+gene+Hakonarson+2007">https://scholar.google.com/scholar?q=A+genome-wide+association+study+identifies+KIAA0350+as+a+type+1+diabetes+gene+Hakonarson+2007</a>                           |                        |
| CHOP-McGill      | CHOPTDT* | Illumina HumanHap550     | 483    | 0        | 465     | 0        | 46%             | <a href="https://scholar.google.com/scholar?q=A+genome-wide+association+study+identifies+KIAA0350+as+a+type+1+diabetes+gene+Hakonarson+2007">https://scholar.google.com/scholar?q=A+genome-wide+association+study+identifies+KIAA0350+as+a+type+1+diabetes+gene+Hakonarson+2007</a>                           |                        |
| TwinsUK Resource | TwinsUK  | Illumina HumanHap610     | 0      | 3461     | 0       | 2540     | 13%             | <a href="https://scholar.google.com/scholar?hl=en&amp;as_sdr=0%2C3&amp;q=TwinsUK%3A+The+UK+Adult+Twin+Registry+Update+&amp;btnG=">https://scholar.google.com/scholar?hl=en&amp;as_sdr=0%2C3&amp;q=TwinsUK%3A+The+UK+Adult+Twin+Registry+Update+&amp;btnG=</a>                                                 |                        |
| WTCCC (EGA)      | 1999C    | Human1-2M-DuoCustom_v1_A | 0      | 2930     | 0       | 2836     | 51%             | <a href="http://scholar.google.com/scholar?q=Genome-wide+association+study+of+14%2C000+cases+of+seven+common+diseases+and+3%2C000+shared+controls.++2007">http://scholar.google.com/scholar?q=Genome-wide+association+study+of+14%2C000+cases+of+seven+common+diseases+and+3%2C000+shared+controls.++2007</a> |                        |
| WTCCC (EGA)      | NBS      | Human1-2M-DuoCustom_v1_A | 0      | 2737     | 0       | 2633     | 50%             | <a href="http://scholar.google.com/scholar?q=Genome-wide+association+study+of+14%2C000+cases+of+seven+common+diseases+and+3%2C000+shared+controls.++2007">http://scholar.google.com/scholar?q=Genome-wide+association+study+of+14%2C000+cases+of+seven+common+diseases+and+3%2C000+shared+controls.++2007</a> |                        |
| Affymetrix Total |          |                          | 3173   | 5998     | 3081    | 5768     | 50%             | 45%                                                                                                                                                                                                                                                                                                           |                        |
| Illumina Total   |          |                          | 6511   | 11155    | 6277    | 9937     | 53%             | 41%                                                                                                                                                                                                                                                                                                           |                        |
| Grand Total      |          |                          | 9684   | 17153    | 9358    | 15705    | 52%             | 43%                                                                                                                                                                                                                                                                                                           |                        |

\*children only, excludes 1449 parents

# SUPPLEMENTARY DATA

**Table S2.** All conditionally independent GWAS SNPs. Columns are chromosome; SNP; physical position; effect allele; frequency of the effect allele in the original data;

effect size, standard error and p-value from the discovery GWAS; estimated effective sample size; frequency of the effect allele in the reference sample; effect size, standard error

and p-value from a joint analysis of all the selected SNPs; LD correlation between the SNP i and SNP i + 1 for the SNPs on the list; being within 1Mb of the MHC; having more than 3 satellite SNPs

| Chr | SNP             | bp        | refA | freq   | b       | se     | p         | n       | freq_gen0 | bj      | bj_se  | pj       | LD_r    | MHC | >=3 satellites |
|-----|-----------------|-----------|------|--------|---------|--------|-----------|---------|-----------|---------|--------|----------|---------|-----|----------------|
| 10  | rs12722495      | 6097283   | C    | 0.1122 | -0.3145 | 0.0408 | 1.27E-14  | 20536.7 | 0.0985    | -0.3119 | 0.0409 | 2.30E-14 | 0.0113  | NO  | YES            |
| 10  | rs201580745     | 25340868  | T    | 0.093  | -0.472  | 0.0601 | 4.23E-15  | 11148   | 0.0446    | -0.4682 | 0.0603 | 7.94E-15 | 0       | NO  | NO             |
| 10  | rs77523242      | 62395516  | C    | 0.0623 | -0.3705 | 0.0635 | 5.42E-09  | 14464.5 | 0.0420    | -0.3683 | 0.0636 | 6.91E-09 | 0.0059  | NO  | YES            |
| 10  | rs201844300     | 63379883  | C    | 0.0812 | -0.4198 | 0.0631 | 2.88E-11  | 11453   | 0.0370    | -0.4179 | 0.0632 | 3.85E-11 | 0       | NO  | NO             |
| 10  | rs199548940     | 94052740  | C    | 0.0548 | -0.5045 | 0.0812 | 5.08E-10  | 9961.86 | 0.0215    | -0.5045 | 0.0814 | 5.60E-10 | 0       | NO  | NO             |
| 11  | rs689           | 2182224   | T    | 0.7109 | 0.7004  | 0.0354 | 2.30E-87  | 12872.1 | 0.7695    | 0.7004  | 0.0359 | 1.29E-84 | 0       | NO  | YES            |
| 11  | rs10830227      | 88890822  | A    | 0.5741 | 0.1582  | 0.0233 | 1.02E-11  | 25687.4 | 0.6165    | 0.1570  | 0.0233 | 1.66E-11 | -0.0118 | NO  | YES            |
| 11  | rs79075295      | 108114749 | A    | 0.0921 | -0.4192 | 0.0621 | 1.46E-11  | 10548.2 | 0.0405    | -0.4160 | 0.0622 | 2.31E-11 | 0       | NO  | NO             |
| 12  | rs2071647       | 9914005   | A    | 0.2755 | 0.1526  | 0.0258 | 3.30E-09  | 25732.6 | 0.2822    | 0.1526  | 0.0258 | 3.40E-09 | 0       | NO  | YES            |
| 12  | rs201980362     | 46530157  | A    | 0.0443 | -0.6077 | 0.0892 | 9.61E-12  | 10117.1 | 0.0199    | -0.6085 | 0.0894 | 1.00E-11 | 0.0017  | NO  | YES            |
| 12  | rs1131017       | 56435929  | G    | 0.5803 | -0.2461 | 0.0238 | 4.24E-25  | 24708.8 | 0.5592    | -0.2429 | 0.0239 | 2.37E-24 | -0.0152 | NO  | NO             |
| 12  | rs74094155      | 60969507  | T    | 0.0665 | 0.8633  | 0.112  | 1.29E-14  | 42202.5 | 0.0148    | 0.8491  | 0.1121 | 3.59E-14 | -0.0093 | NO  | YES            |
| 12  | rs201909803     | 71287755  | T    | 0.0471 | -0.4916 | 0.0842 | 5.18E-09  | 10725.7 | 0.0202    | -0.4827 | 0.0843 | 1.04E-08 | 0       | NO  | NO             |
| 12  | rs10774624      | 111833788 | A    | 0.5037 | -0.2556 | 0.0244 | 1.34E-25  | 22893   | 0.4847    | -0.2532 | 0.0245 | 4.07E-25 | -0.0145 | NO  | YES            |
| 12  | rs61944716      | 118915240 | A    | 0.1912 | 0.2126  | 0.0308 | 5.35E-12  | 23289.3 | 0.1916    | 0.2080  | 0.0308 | 1.52E-11 | 0       | NO  | YES            |
| 13  | rs202019816     | 45973877  | T    | 0.0717 | -0.4056 | 0.0675 | 1.84E-09  | 11207   | 0.0325    | -0.4056 | 0.0676 | 1.98E-09 | 0       | NO  | NO             |
| 13  | rs201630594     | 91897739  | C    | 0.0675 | -0.4422 | 0.0723 | 9.73E-10  | 10325.4 | 0.0278    | -0.4422 | 0.0724 | 1.03E-09 | 0       | NO  | NO             |
| 14  | rs139140717     | 37424426  | C    | 0.0055 | 1       | 0.1404 | 1.04E-12  | 31862.6 | 0.0097    | 1.0000  | 0.1405 | 1.10E-12 | 0       | NO  | NO             |
| 14  | rs194739        | 69301874  | T    | 0.2655 | -0.161  | 0.0276 | 5.68E-09  | 23129.5 | 0.2483    | -0.1610 | 0.0276 | 5.57E-09 | 0       | NO  | YES            |
| 14  | rs200639691     | 89616782  | G    | 0.0718 | -0.4653 | 0.0697 | 2.44E-11  | 10583.9 | 0.0314    | -0.4365 | 0.0700 | 4.44E-10 | -0.0146 | NO  | YES            |
| 14  | rs17125653      | 89717348  | A    | 0.077  | 0.2355  | 0.0402 | 4.75E-09  | 29924.8 | 0.1022    | 0.2330  | 0.0402 | 6.96E-09 | -0.0027 | NO  | NO             |
| 14  | rs74085189      | 100671500 | A    | 0.0732 | -0.4555 | 0.0736 | 6.15E-10  | 93255.2 | 0.0266    | -0.4260 | 0.0739 | 8.16E-09 | 0       | NO  | NO             |
| 15  | rs200494724     | 49049214  | A    | 0.0749 | -0.4582 | 0.0701 | 6.43E-11  | 10139.6 | 0.0300    | -0.4573 | 0.0702 | 7.53E-11 | -0.0031 | NO  | NO             |
| 15  | rs4566101       | 49219631  | C    | 0.2697 | 0.1755  | 0.0255 | 6.23E-12  | 27021.1 | 0.3291    | 0.1752  | 0.0255 | 6.70E-12 | 0       | NO  | YES            |
| 15  | rs78852152      | 81650586  | C    | 0.0326 | -0.6509 | 0.1085 | 1.96E-09  | 9302.43 | 0.0127    | -0.6509 | 0.1087 | 2.13E-09 | 0       | NO  | NO             |
| 16  | rs741172        | 11200798  | T    | 0.3205 | -0.2034 | 0.0258 | 3.11E-15  | 24299.5 | 0.3062    | -0.2046 | 0.0258 | 2.37E-15 | 0.0077  | NO  | YES            |
| 16  | 16_28536519_A_G | 28536519  | G    | 0.1026 | 0.2411  | 0.0399 | 1.55E-09  | 24056.1 | 0.0894    | 0.2435  | 0.0399 | 1.07E-09 | 0       | NO  | YES            |
| 16  | rs8056814       | 7552327   | A    | 0.0793 | 0.2641  | 0.0415 | 1.99E-10  | 28044.5 | 0.0874    | 0.2639  | 0.0415 | 2.08E-10 | -0.0011 | NO  | YES            |
| 16  | rs199807703     | 79926755  | C    | 0.0733 | -0.4236 | 0.0691 | 8.60E-10  | 10851.4 | 0.0295    | -0.4233 | 0.0692 | 9.62E-10 | 0       | NO  | NO             |
| 17  | rs140339358     | 47362736  | C    | 0.1209 | -0.4061 | 0.0555 | 2.41E-13  | 10913.1 | 0.0524    | -0.4061 | 0.0556 | 2.89E-13 | 0       | NO  | NO             |
| 18  | rs200941228     | 24900339  | T    | 0.0602 | -0.4977 | 0.0761 | 6.26E-11  | 10488.2 | 0.0260    | -0.4601 | 0.0765 | 1.80E-09 | 0.0850  | NO  | NO             |
| 18  | rs372063934     | 29523372  | G    | 0.1326 | -0.3341 | 0.0498 | 2.04E-11  | 12051   | 0.0668    | -0.3102 | 0.0500 | 5.69E-10 | 0       | NO  | NO             |
| 18  | rs145224611     | 6978474   | C    | 0.0126 | 1.1337  | 0.1623 | 2.82E-12  | 10479.8 | 0.0034    | 1.1337  | 0.1623 | 3.18E-12 | 0       | NO  | NO             |
| 19  | rs34536443      | 10463118  | C    | 0.0515 | -0.4139 | 0.0665 | 4.84E-10  | 17478.3 | 0.0360    | -0.4139 | 0.0666 | 5.06E-10 | 0       | NO  | YES            |
| 1   | rs72661818      | 36380971  | C    | 0.0959 | -0.4369 | 0.0663 | 4.50E-11  | 8996.05 | 0.0340    | -0.4369 | 0.0665 | 4.89E-11 | 0       | NO  | NO             |
| 1   | rs2269247       | 64107284  | T    | 0.1804 | 0.1709  | 0.0295 | 7.28E-09  | 26739.1 | 0.1879    | 0.1709  | 0.0295 | 7.05E-09 | 0       | NO  | YES            |
| 1   | rs6679677       | 114303808 | A    | 0.0993 | 0.6527  | 0.0346 | 3.42E-79  | 31817   | 0.1237    | 0.6527  | 0.0348 | 1.61E-78 | 0       | NO  | YES            |
| 1   | rs201886798     | 164935903 | A    | 0.064  | -0.4224 | 0.0733 | 8.32E-09  | 10670.5 | 0.0269    | -0.4238 | 0.0734 | 7.81E-09 | -0.0043 | NO  | NO             |
| 1   | rs10911399      | 183646903 | G    | 0.0455 | -0.3707 | 0.064  | 6.75E-09  | 19332.1 | 0.0377    | -0.3719 | 0.0641 | 6.40E-09 | 0       | NO  | NO             |
| 20  | rs202525        | 1673775   | A    | 0.7226 | -0.1574 | 0.0256 | 8.02E-10  | 26447   | 0.7110    | -0.1565 | 0.0256 | 1.01E-09 | 0.0088  | NO  | YES            |
| 20  | rs200152879     | 17433315  | G    | 0.0414 | -0.6024 | 0.091  | 3.55E-11  | 10543.5 | 0.0186    | -0.5993 | 0.0912 | 4.95E-11 | 0       | NO  | NO             |
| 21  | rs2128344       | 22096544  | A    | 0.0055 | 0.7827  | 0.1271 | 7.36E-10  | 39278.3 | 0.0317    | 0.7827  | 0.1272 | 7.50E-10 | 0       | NO  | YES            |
| 22  | rs201423380     | 22161282  | G    | 0.0415 | -0.5695 | 0.0977 | 5.58E-09  | 9420.46 | 0.0141    | -0.5695 | 0.0979 | 5.92E-09 | 0       | NO  | NO             |
| 22  | rs200920407     | 12723911  | C    | 0.0362 | -0.587  | 0.1017 | 7.70E-09  | 9455.95 | 0.0137    | -0.5870 | 0.1019 | 8.31E-09 | 0       | NO  | NO             |
| 2   | rs1869449       | 33613232  | A    | 0.2967 | 0.1769  | 0.0269 | 4.55E-11  | 22633.5 | 0.3258    | 0.1769  | 0.0269 | 5.03E-11 | 0       | NO  | YES            |
| 2   | rs10183097      | 74914779  | C    | 0.1362 | 0.2053  | 0.0322 | 1.82E-10  | 28029   | 0.1472    | 0.2056  | 0.0322 | 1.75E-10 | 0.0019  | NO  | YES            |
| 2   | rs10865468      | 84040260  | C    | 0.2527 | -0.1624 | 0.0277 | 4.66E-09  | 23596.7 | 0.2215    | -0.1627 | 0.0277 | 4.36E-09 | 0       | NO  | YES            |
| 2   | 2_142300935_T_G | 142300935 | G    | 0.0131 | 0.562   | 0.0875 | 1.37E-10  | 34550.8 | 0.0199    | 0.5620  | 0.0876 | 1.37E-10 | 0       | NO  | YES            |
| 2   | rs2111485       | 163110536 | G    | 0.6033 | 0.1577  | 0.0248 | 1.89E-10  | 23221.4 | 0.6157    | 0.1596  | 0.0248 | 1.28E-10 | -0.0146 | NO  | YES            |
| 2   | rs60587303      | 169046632 | C    | 0.0051 | 0.7948  | 0.1355 | 4.43E-09  | 36719.9 | 0.0119    | 0.7987  | 0.1356 | 3.84E-09 | -0.0145 | NO  | YES            |
| 2   | rs201270504     | 171809973 | G    | 0.028  | -0.739  | 0.1157 | 1.68E-10  | 9358.15 | 0.0112    | -0.7350 | 0.1159 | 2.32E-10 | 0       | NO  | NO             |
| 2   | rs11571297      | 204745003 | C    | 0.4844 | -0.1964 | 0.0237 | 1.11E-16  | 24339.1 | 0.4688    | -0.1962 | 0.0237 | 1.36E-16 | 0.0018  | NO  | YES            |
| 2   | rs200743609     | 221229333 | A    | 0.1005 | -0.3873 | 0.0619 | 4.00E-10  | 9846.83 | 0.0389    | -0.3848 | 0.0620 | 5.50E-10 | -0.0083 | NO  | NO             |
| 2   | rs17863786      | 234607863 | G    | 0.0293 | 0.4144  | 0.0628 | 4.26E-11  | 30482.2 | 0.0405    | 0.4126  | 0.0628 | 5.21E-11 | 0       | NO  | NO             |
| 3   | rs201495159     | 69522710  | C    | 0.1002 | -0.363  | 0.0566 | 1.43E-10  | 11814.4 | 0.0478    | -0.3630 | 0.0566 | 1.53E-10 | 0       | NO  | NO             |
| 3   | rs201539385     | 135731473 | A    | 0.1198 | -0.3387 | 0.0537 | 2.77E-10  | 11221.3 | 0.0557    | -0.3387 | 0.0538 | 3.05E-10 | 0       | NO  | NO             |
| 3   | rs80224989      | 179301170 | G    | 0.0608 | -0.4791 | 0.0743 | 1.17E-10  | 10820.9 | 0.0251    | -0.4791 | 0.0744 | 1.23E-10 | 0       | NO  | NO             |
| 4   | rs62410259      | 41713671  | A    | 0.077  | -0.3796 | 0.0533 | 1.02E-12  | 16920.2 | 0.0579    | -0.3770 | 0.0534 | 1.63E-12 | -0.0117 | NO  | NO             |
| 4   | rs150445692     | 58384375  | T    | 0.0052 | 0.8205  | 0.1417 | 7.04E-09  | 32954.9 | 0.0064    | 0.8121  | 0.1418 | 1.01E-08 | 0       | NO  | NO             |
| 5   | rs199552154     | 57982406  | T    | 0.0653 | -0.4164 | 0.0701 | 2.78E-09  | 11366.7 | 0.0296    | -0.4164 | 0.0702 | 3.01E-09 | 0       | NO  | NO             |
| 5   | rs202091821     | 135727349 | G    | 0.0652 | -0.4344 | 0.073  | 2.69E-09  | 10493.8 | 0.0278    | -0.4344 | 0.0731 | 2.83E-09 | 0       | NO  | NO             |
| 5   | rs184405565     | 157776381 | A    | 0.0591 | -0.4946 | 0.0751 | 4.58E-11  | 10860.8 | 0.0265    | -0.4946 | 0.0752 | 4.93E-11 | 0       | NO  | NO             |
| 6   | rs1770129       | 28095146  | T    | 0.0171 | 0.8145  | 0.0966 | 3.35E-17  | 21793.9 | 0.0129    | 0.5724  | 0.0973 | 4.03E-09 | -0.0393 | YES | NO             |
| 6   | 6_29819325_C_T  | 29819325  | T    | 0.2658 | 0.0296  | 0.0299 | 0.3219    | 19655.3 | 0.2305    | -0.2084 | 0.0322 | 1.04E-10 | 0.0044  | YES | NO             |
| 6   | 6_31247135_T_C  | 31247135  | C    | 0.1099 | -0.608  | 0.0525 | 5.37E-31  | 12585.4 | 0.0808    | -0.3486 | 0.0547 | 1.82E-10 | 0.0319  | YES | NO             |
| 6   | 6_31745284_C_T  | 31745284  | T    | 0.5365 | 0.5662  | 0.0301 | 4.50E-79  | 14868   | 0.5806    | 0.2714  | 0.0335 | 5.40E-16 | -0.0962 | YES | NO             |
| 6   | 6_32199239_C_T  | 32199239  | T    | 0.2486 | -0.6982 | 0.0373 | 2.40E-78  | 12845.3 | 0.1913    | -0.3813 | 0.0410 | 1.34E-20 | -0.1257 | YES | NO             |
| 6   | 6_32373378_A_T  | 32373378  | T    | 0.0368 | 1.4324  | 0.0596 | 1.22E-127 | 26658.8 | 0.0487    | 0.6135  | 0.0596 | 5.66E-20 | -0.0323 | YES | NO             |
| 6   | 6_32390751_T_C  | 32390751  | C    | 0.0282 | 1.189   | 0.0699 | 6.18E-65  | 25321.7 | 0.0303    | 0.5144  | 0.0735 | 2.52E-12 | -0.0064 | YES | NO             |
| 6   | 6_32395942_C_T  | 32395942  | T    | 0.0236 | 1.4118  | 0.0691 | 9.09E-93  | 30750.5 | 0.0312    | 0.6295  | 0.0744 | 2.57E-17 | 0.0963  | YES | NO             |
| 6   | 6_32397309_A_G  | 32397309  | G    | 0.815  | 1.7582  | 0.0633 | 1.21E-169 | 4905.66 | 0.8800    | 0.7451  | 0.0814 | 5.38E-20 | 0.3163  | YES | NO             |
| 6   | rs67216854      | 32512766  |      |        |         |        |           |         |           |         |        |          |         |     |                |

## SUPPLEMENTARY DATA

**Table S3. Filtered conditionally independent GWAS SNPs.** Columns are chromosome; SNP; physical position; effect allele; frequency of the effect allele in the original data; effect size, standard error and p-value from the discovery GWAS; estimated effective sample size; frequency of the effect allele in the reference sample; effect size, standard error and p-value from a joint analysis of all the selected SNPs; LD correlation between the SNP *i* and SNP *i* + 1 for the SNPs on the list.

| Chr | SNP         | bp        | refA | freq   | b       | se     | p        | n       | freq_geno | bJ      | bJ_se  | pJ       | LD_r    |
|-----|-------------|-----------|------|--------|---------|--------|----------|---------|-----------|---------|--------|----------|---------|
| 1   | rs2269247   | 64107284  | T    | 0.1804 | 0.1709  | 0.0295 | 7.28E-09 | 26739.1 | 0.1879    | 0.1709  | 0.0295 | 7.05E-09 | 0.0000  |
| 1   | rs6679677   | 114303808 | A    | 0.0993 | 0.6527  | 0.0346 | 3.42E-79 | 31817   | 0.1237    | 0.6527  | 0.0348 | 1.61E-78 | 0.0000  |
| 2   | rs1869449   | 33613232  | A    | 0.2967 | 0.1769  | 0.0269 | 4.55E-11 | 22633.5 | 0.3258    | 0.1769  | 0.0269 | 5.03E-11 | 0.0000  |
| 2   | rs10183097  | 74914779  | C    | 0.1362 | 0.2053  | 0.0322 | 1.82E-10 | 28029   | 0.1472    | 0.2056  | 0.0322 | 1.75E-10 | 0.0019  |
| 2   | rs10865468  | 84040260  | C    | 0.2527 | -0.1624 | 0.0277 | 4.66E-09 | 23596.7 | 0.2215    | -0.1627 | 0.0277 | 4.36E-09 | 0.0000  |
| 2   | 142300935_T | 142300935 | G    | 0.0131 | 0.562   | 0.0875 | 1.37E-10 | 34550.8 | 0.0199    | 0.5620  | 0.0876 | 1.37E-10 | 0.0000  |
| 2   | rs2111485   | 163110536 | G    | 0.6033 | 0.1577  | 0.0248 | 1.89E-10 | 23221.4 | 0.6157    | 0.1596  | 0.0248 | 1.28E-10 | -0.0146 |
| 2   | rs60587303  | 169046632 | C    | 0.0051 | 0.7948  | 0.1355 | 4.43E-09 | 36719.9 | 0.0119    | 0.7987  | 0.1356 | 3.84E-09 | -0.0145 |
| 2   | rs11571297  | 204745003 | C    | 0.4844 | -0.1964 | 0.0237 | 1.11E-16 | 24339.1 | 0.4688    | -0.1962 | 0.0237 | 1.36E-16 | 0.0018  |
| 10  | rs12722495  | 6097283   | C    | 0.1122 | -0.3145 | 0.0408 | 1.27E-14 | 20536.7 | 0.0985    | -0.3119 | 0.0409 | 2.30E-14 | 0.0113  |
| 10  | rs77523242  | 62395516  | C    | 0.0623 | -0.3705 | 0.0635 | 5.42E-09 | 14464.5 | 0.0420    | -0.3683 | 0.0636 | 6.91E-09 | 0.0059  |
| 11  | rs689       | 2182224   | T    | 0.7109 | 0.7004  | 0.0354 | 2.30E-87 | 12872.1 | 0.7695    | 0.7004  | 0.0359 | 1.29E-84 | 0.0000  |
| 11  | rs10830227  | 88890822  | A    | 0.5741 | 0.1582  | 0.0233 | 1.02E-11 | 25687.4 | 0.6165    | 0.1570  | 0.0233 | 1.66E-11 | -0.0118 |
| 12  | rs2071647   | 9914005   | A    | 0.2755 | 0.1526  | 0.0258 | 3.30E-09 | 25732.6 | 0.2822    | 0.1526  | 0.0258 | 3.40E-09 | 0.0000  |
| 12  | rs1131017   | 56435929  | G    | 0.5803 | -0.2461 | 0.0238 | 4.24E-25 | 24708.8 | 0.5592    | -0.2429 | 0.0239 | 2.37E-24 | -0.0152 |
| 12  | rs74094155  | 60969507  | T    | 0.0065 | 0.8633  | 0.112  | 1.29E-14 | 42202.5 | 0.0148    | 0.8491  | 0.1121 | 3.59E-14 | -0.0093 |
| 12  | rs10774624  | 111833788 | A    | 0.5037 | -0.2556 | 0.0244 | 1.34E-25 | 22893   | 0.4847    | -0.2532 | 0.0245 | 4.07E-25 | -0.0145 |
| 12  | rs61944716  | 118915240 | A    | 0.1912 | 0.2126  | 0.0308 | 5.35E-12 | 23289.3 | 0.1916    | 0.2080  | 0.0308 | 1.52E-11 | 0.0000  |
| 14  | rs194739    | 69301874  | T    | 0.2655 | -0.161  | 0.0276 | 5.68E-09 | 23129.5 | 0.2483    | -0.1610 | 0.0276 | 5.57E-09 | 0.0000  |
| 14  | rs17125653  | 89771348  | A    | 0.077  | 0.2355  | 0.0402 | 4.75E-09 | 29924.8 | 0.1022    | 0.2330  | 0.0402 | 6.96E-09 | -0.0027 |
| 15  | rs4566101   | 49219631  | C    | 0.2697 | 0.1755  | 0.0255 | 6.23E-12 | 27021.1 | 0.3291    | 0.1752  | 0.0255 | 6.70E-12 | 0.0000  |
| 16  | rs741172    | 11200798  | T    | 0.3205 | -0.2034 | 0.0258 | 3.11E-15 | 24299.5 | 0.3062    | -0.2046 | 0.0258 | 2.37E-15 | 0.0077  |
| 16  | 28536519_A  | 28536519  | G    | 0.1026 | 0.2411  | 0.0399 | 1.55E-09 | 24056.1 | 0.0894    | 0.2435  | 0.0399 | 1.07E-09 | 0.0000  |
| 16  | rs8056814   | 75252327  | A    | 0.0793 | 0.2641  | 0.0415 | 1.99E-10 | 28044.5 | 0.0874    | 0.2639  | 0.0415 | 2.08E-10 | -0.0011 |
| 19  | rs34536443  | 10463118  | C    | 0.0515 | -0.4139 | 0.0665 | 4.84E-10 | 17478.3 | 0.0360    | -0.4139 | 0.0666 | 5.06E-10 | 0.0000  |
| 20  | rs202525    | 1673775   | A    | 0.7226 | -0.1574 | 0.0256 | 8.02E-10 | 26447   | 0.7110    | -0.1565 | 0.0256 | 1.01E-09 | 0.0088  |
| 21  | rs2128344   | 22096544  | A    | 0.0055 | 0.7827  | 0.1271 | 7.36E-10 | 39278.3 | 0.0317    | 0.7827  | 0.1272 | 7.50E-10 | 0.0000  |

## SUPPLEMENTARY DATA

**Table S4. Conditionally independent SNPs chosen for replication.** Columns are candidate gene; chromosome; SNP; physical position; effect allele; frequency of the effect allele in the original data; effect size; standard error and p-value from the discovery GWAS; estimated effective sample size; frequency of the effect allele in the reference sample; effect size, standard error and p-value from a joint analysis of all the selected SNPs; LD correlation between the SNP *i* and SNP *i* + 1 for the SNPs on the list.

| Candidate gene | Chr | SNP             | bp        | refA | freq   | b       | se     | p        | n       | freq_gen0 | bJ      | bJ_se  | pJ       | LD_r    |
|----------------|-----|-----------------|-----------|------|--------|---------|--------|----------|---------|-----------|---------|--------|----------|---------|
| <i>PGM1</i>    | 1   | rs2269247       | 64107284  | T    | 0.1804 | 0.1709  | 0.0295 | 7.28E-09 | 26739.1 | 0.1879    | 0.1709  | 0.0295 | 7.05E-09 | 0       |
| <i>LRP1B</i>   | 2   | 2_142300935_T_G | 142300935 | G    | 0.0131 | 0.562   | 0.0875 | 1.37E-10 | 34550.8 | 0.0199    | 0.5620  | 0.0876 | 1.37E-10 | 0       |
| <i>STK39</i>   | 2   | rs60587303      | 169046632 | C    | 0.0051 | 0.7948  | 0.1355 | 4.43E-09 | 36719.9 | 0.0119    | 0.7987  | 0.1356 | 3.84E-09 | -0.0145 |
| <i>INS</i>     | 11  | rs689           | 2182224   | T    | 0.7109 | 0.7004  | 0.0354 | 2.30E-87 | 12872.1 | 0.7695    | 0.7004  | 0.0359 | 1.29E-84 | 0       |
| intergenic     | 12  | rs74094155      | 60969507  | T    | 0.0065 | 0.8633  | 0.112  | 1.29E-14 | 42202.5 | 0.0148    | 0.8491  | 0.1121 | 3.59E-14 | -0.0093 |
| intergenic     | 12  | rs61944716      | 118915240 | A    | 0.1912 | 0.2126  | 0.0308 | 5.35E-12 | 23289.3 | 0.1916    | 0.2080  | 0.0308 | 1.52E-11 | 0       |
| <i>TYK2</i>    | 19  | rs34536443      | 10463118  | C    | 0.0515 | -0.4139 | 0.0665 | 4.84E-10 | 17478.3 | 0.0360    | -0.4139 | 0.0666 | 5.06E-10 | 0       |
| intergenic     | 21  | rs2128344       | 22096544  | A    | 0.0055 | 0.7827  | 0.1271 | 7.36E-10 | 39278.3 | 0.0317    | 0.7827  | 0.1272 | 7.50E-10 | 0       |

SUPPLEMENTARY DATA

**Table S5. Results of the replication.** Columns are chromosome; SNP; physical position; the effect allele; the non-effect allele; replication sample size; effect allele frequency in the replication cohort; effect size, standard error and p-value from the replication GWAS

| <b>Chr</b> | <b>SNP</b>   | <b>bp</b> | <b>A1</b> | <b>A2</b> | <b>n</b> | <b>AF</b> | <b>b</b> | <b>se</b> | <b>p</b> |
|------------|--------------|-----------|-----------|-----------|----------|-----------|----------|-----------|----------|
| 1          | rs2269247    | 64107284  | T         | C         | 13848    | 0.182     | 0.133    | 0.042     | 1.66E-03 |
| 2          | rs192324744* | 142300935 | G         | T         | 13849    | 0.016     | 0.344    | 0.124     | 5.56E-03 |
| 2          | rs60587303   | 169046632 | C         | T         | 13857    | 0.006     | 0.448    | 0.198     | 2.37E-02 |
| 11         | rs689        | 2182224   | T         | A         | 13676    | 0.759     | 0.897    | 0.043     | 2.28E-96 |
| 12         | rs74094155   | 60969507  | T         | G         | 13858    | 0.006     | -0.405   | 0.229     | 7.73E-02 |
| 19         | rs34536443   | 10463118  | C         | G         | 13668    | 0.037     | -0.310   | 0.092     | 6.97E-04 |
| 21         | rs2128344    | 22096544  | A         | T         | 13836    | 0.005     | 0.658    | 0.217     | 2.46E-03 |

\*discovery GWAS SNP identifier: 2\_142300935\_T\_G



# SUPPLEMENTARY DATA

Table S6: Results of the FINEMAP for all 27 independent loci of the discovery GWAS. maf: minor allele frequency of allele1; prob: marginal Posterior Inclusion Probabilities; log10bf: log10 Bayes factors; mean: marginalized shrinkage estimates of the posterior effect size; mean\_sd: marginalized shrinkage estimates of the posterior effect size standard deviation; mean\_incl: conditional estimates of the posterior effect size; mean\_sd\_incl: conditional estimates of the posterior effect size standard deviation

| Locus | SNP             | Chr | pos       | allele1 | allele2 | maf    | beta    | sc     | z        | prob   | log10bf | group | corr   | prob_group | log10bf_group | mean    | sd     | mean_incl | sd_incl |
|-------|-----------------|-----|-----------|---------|---------|--------|---------|--------|----------|--------|---------|-------|--------|------------|---------------|---------|--------|-----------|---------|
| L1    | rs527839674     | 1   | 64330523  | T       | A       | 0.0054 | -1.043  | 0.1992 | -5.2359  | 0.9581 | 4.3653  | 1510  | 1      | 0.9581     | 4.3653        | -0.2846 | 0.0836 | -0.2971   | 0.0599  |
| L1    | rs2269247       | 1   | 64107284  | C       | T       | 0.1804 | -0.1709 | 0.0295 | -5.7932  | 0.3501 | 2.7372  | 700   | 1      | 0.9742     | 4.5821        | -0.0220 | 0.0307 | -0.0628   | 0.0115  |
| L1    | rs151163995     | 1   | 64054976  | G       | A       | 0.0052 | -0.6241 | 0.1681 | -3.7127  | 0.1085 | 2.0913  | 521   | 1      | 0.1085     | 2.0913        | -0.0243 | 0.0724 | -0.2235   | 0.0610  |
| L1    | rs77425734      | 1   | 114174506 | A       | G       | 0.0638 | -0.3475 | 0.0714 | -4.8670  | 0.9978 | 5.5083  | 312   | 1      | 0.9978     | 5.5083        | 0.0956  | 0.0184 | 0.0958    | 0.0478  |
| L1    | rs6679677       | 1   | 114303808 | C       | A       | 0.0993 | -0.6527 | 0.0346 | -18.8642 | 0.9796 | 4.5239  | 574   | 1      | 1.0000     | 12.8444       | -0.2582 | 0.0427 | -0.2636   | 0.0210  |
| L3    | rs1869449       | 2   | 33613232  | G       | A       | 0.2967 | -0.1769 | 0.0269 | -6.5762  | 1.0000 | 13.1289 | 1085  | 1      | 1.0000     | 13.1289       | -0.1541 | 0.0179 | -0.1541   | 0.0179  |
| L3    | rs17012922      | 2   | 33610073  | G       | A       | 0.2842 | -0.0426 | 0.0274 | -1.5547  | 0.3462 | 3.2411  | 1073  | 1      | 0.5971     | 3.2998        | 0.0615  | 0.0561 | 0.1090    | 0.0201  |
| L3    | rs76108377      | 2   | 33587496  | A       | T       | 0.0402 | -0.1072 | 0.0617 | -1.7374  | 0.4126 | 2.9756  | 985   | 1      | 0.4126     | 2.9756        | -0.0562 | 0.0692 | -0.1363   | 0.0264  |
| L3    | rs13009128      | 2   | 33605568  | A       | G       | 0.3605 | -0.0275 | 0.026  | -1.0577  | 0.3057 | 3.0236  | 1054  | 1      | 0.4397     | 3.0236        | 0.0331  | 0.0103 | 0.1083    | 0.0208  |
| L4    | rs10183097      | 2   | 74914779  | T       | C       | 0.1362 | -0.2053 | 0.0322 | -6.3758  | 0.9992 | 5.9308  | 343   | 1      | 1.0000     | 12.8456       | -0.3125 | 0.0373 | -0.3128   | 0.0362  |
| L4    | rs191289495     | 2   | 74923095  | T       | C       | 0.0883 | -0.1386 | 0.0714 | -1.6952  | 0.5408 | 2.9167  | 200   | 0.9322 | 0.9644     | 4.2778        | 0.1488  | 0.1415 | 0.0751    | 0.0478  |
| L4    | rs11126435      | 2   | 74978700  | A       | T       | 0.1198 | -0.0875 | 0.0351 | -2.4929  | 0.4866 | 4.2823  | 224   | 0.9761 | 0.9883     | 3.7116        | 0.1011  | 0.1071 | 0.2079    | 0.0573  |
| L4    | rs6748041       | 2   | 74893041  | T       | G       | 0.1513 | -0.0501 | 0.0331 | -1.5136  | 0.4775 | 2.8065  | 310   | 1      | 0.4775     | 2.8065        | 0.0457  | 0.0508 | 0.0957    | 0.0250  |
| L5    | rs60482136      | 2   | 84039267  | T       | C       | 0.2172 | 0.1662  | 0.0294 | 5.6531   | 0.4884 | 3.0074  | 827   | 0.9120 | 1.0000     | 13.0275       | 0.0734  | 0.0764 | 0.1503    | 0.0196  |
| L5    | rs7577133       | 2   | 84030966  | A       | G       | 0.2109 | 0.0429  | 0.029  | 1.4793   | 0.1125 | 2.1306  | 839   | 0.9208 | 0.9577     | 4.3828        | -0.0126 | 0.0359 | -0.1116   | 0.0199  |
| L6    | 2_142300935_T_G | 2   | 142300935 | T       | G       | 0.0131 | -0.562  | 0.0875 | -6.4229  | 0.9541 | 4.4870  | 1291  | 1      | 0.9541     | 4.4870        | -0.1929 | 0.0642 | -0.2022   | 0.0494  |
| L6    | rs12476844      | 2   | 142307636 | C       | T       | 0.2779 | 0.1092  | 0.0264 | 4.1364   | 0.6409 | 3.4210  | 1329  | 0.9443 | 0.9966     | 5.6425        | 0.0798  | 0.0617 | 0.1245    | 0.0194  |
| L6    | rs16846467      | 2   | 142316877 | T       | A       | 0.2658 | -0.1023 | 0.0265 | -4.4042  | 0.4528 | 3.0872  | 1296  | 0.9523 | 0.9454     | 4.4077        | -0.0592 | 0.0566 | -0.1148   | 0.0192  |
| L7    | rs2111485       | 2   | 163110356 | A       | G       | 0.3967 | -0.1573 | 0.0248 | -6.3589  | 0.6606 | 3.1074  | 643   | 1      | 0.7807     | 3.3496        | -0.0325 | 0.0247 | -0.0491   | 0.0164  |
| L7    | rs141102226     | 2   | 162992004 | A       | T       | 0.0231 | 0.5348  | 0.1016 | 5.2638   | 0.6520 | 3.0907  | 384   | 1      | 0.6520     | 3.0907        | 0.0833  | 0.0655 | 0.1278    | 0.0299  |
| L7    | rs7907760       | 2   | 163205620 | C       | T       | 0.0196 | 0.4453  | 0.1049 | 4.2450   | 0.1819 | 2.1653  | 898   | 1      | 0.2363     | 2.3087        | 0.0221  | 0.0488 | 0.1213    | 0.0323  |
| L8    | rs60587303      | 2   | 169046632 | T       | C       | 0.0051 | -0.7948 | 0.1355 | -5.8657  | 0.9882 | 4.9948  | 940   | 1      | 0.9882     | 4.9948        | -0.4346 | 0.0815 | -0.4398   | 0.0667  |
| L8    | rs114348754     | 2   | 169046585 | A       | G       | 0.0142 | -0.4155 | 0.0849 | -4.8940  | 0.4928 | 3.0585  | 937   | 1      | 1.0000     | 8.7269        | -0.1629 | 0.1685 | -0.3305   | 0.0743  |
| L8    | rs3769581       | 2   | 169022165 | A       | G       | 0.0186 | 0.1103  | 0.0856 | 1.2886   | 0.2281 | 3.2416  | 805   | 1      | 0.9993     | 6.2306        | 0.0658  | 0.1229 | 0.2886    | 0.0440  |
| L9    | rs14813742      | 2   | 204787560 | C       | T       | 0.0105 | -0.5029 | 0.1147 | -4.3848  | 0.6368 | 3.2368  | 854   | 1      | 0.6368     | 3.2368        | -0.1323 | 0.1025 | -0.2078   | 0.0463  |
| L9    | rs14755035      | 2   | 204803232 | G       | A       | 0.0102 | -0.5085 | 0.1167 | -5.0086  | 0.5978 | 3.1104  | 1525  | 1      | 0.1465     | 3.2368        | -0.1065 | 0.0969 | -0.2750   | 0.0148  |
| L9    | rs1313779       | 2   | 204734887 | C       | T       | 0.3382 | -0.1722 | 0.0239 | -7.2050  | 0.4736 | 2.9471  | 714   | 1      | 0.6777     | 3.3158        | -0.0351 | 0.0376 | -0.0741   | 0.0140  |
| L9    | rs62184059      | 2   | 204671864 | C       | A       | 0.05   | -0.221  | 0.051  | -4.3333  | 0.2996 | 2.6243  | 534   | 1      | 0.8077     | 3.6164        | -0.0333 | 0.0526 | -0.1111   | 0.0206  |
| L9    | rs79197498      | 2   | 204516679 | G       | A       | 0.0285 | -0.3071 | 0.0683 | -4.4963  | 0.2460 | 2.5066  | 45    | 1      | 0.4360     | 2.8812        | -0.0293 | 0.0531 | -0.1193   | 0.0270  |
| L9    | rs141708670     | 2   | 204497841 | C       | G       | 0.0194 | -0.323  | 0.0827 | -3.9057  | 0.1676 | 2.2970  | 9     | 1      | 0.2196     | 2.4422        | -0.0236 | 0.0542 | -0.1409   | 0.0325  |
| L9    | rs190626324     | 2   | 204579795 | C       | G       | 0.0134 | -0.3578 | 0.1015 | -3.5251  | 0.1501 | 2.2399  | 229   | 1      | 0.1599     | 2.2726        | -0.0233 | 0.0575 | -0.1554   | 0.0386  |
| L9    | rs78847176      | 2   | 204725944 | C       | T       | 0.011  | -0.4458 | 0.1106 | -4.6307  | 0.1043 | 2.0591  | 695   | 1      | 0.1043     | 2.0591        | -0.0200 | 0.0604 | -0.1916   | 0.0457  |
| L10   | rs70980229      | 10  | 6110875   | A       | G       | 0.4065 | -0.1855 | 0.0167 | -7.5714  | 0.2028 | 3.1248  | 143   | 1      | 0.9712     | 4.6758        | -0.0505 | 0.0148 | -0.0753   | 0.0146  |
| L10   | rs112722985     | 10  | 6273483   | C       | T       | 0.1122 | 0.3145  | 0.0408 | 7.7085   | 0.2018 | 2.5813  | 1215  | 1      | 0.7264     | 3.6025        | 0.0380  | 0.0369 | 0.0902    | 0.0165  |
| L10   | rs75252425      | 10  | 6217022   | G       | A       | 0.0107 | 0.8593  | 0.1647 | 5.2174   | 0.1831 | 2.5291  | 1832  | 0.9744 | 0.9625     | 4.5878        | 0.0380  | 0.0823 | 0.2073    | 0.0432  |
| L10   | rs12722563      | 10  | 6069561   | G       | A       | 0.1235 | 0.2993  | 0.0397 | 7.5390   | 0.1729 | 2.4985  | 1070  | 1      | 0.2614     | 2.2723        | 0.0144  | 0.0323 | 0.0836    | 0.0155  |
| L10   | rs7893467       | 10  | 6079035   | G       | T       | 0.0732 | 0.208   | 0.043  | 4.8372   | 0.1725 | 2.4975  | 1131  | 1      | 0.1725     | 2.4975        | 0.0127  | 0.0287 | 0.0734    | 0.0800  |
| L10   | rs7073236       | 10  | 6106552   | C       | G       | 0.4083 | -0.1623 | 0.0236 | -6.8771  | 0.1657 | 2.4765  | 1222  | 0.9544 | 0.5746     | 3.3090        | -0.0074 | 0.0171 | -0.0447   | 0.0095  |
| L10   | rs59709453      | 10  | 6032679   | C       | G       | 0.0244 | -0.3049 | 0.0751 | -4.0599  | 0.1171 | 2.2779  | 919   | 1      | 0.1277     | 2.3440        | -0.0127 | 0.0372 | -0.1140   | 0.0291  |
| L10   | rs57893930      | 10  | 6287926   | G       | T       | 0.1151 | -0.1464 | 0.0414 | -3.5362  | 0.0914 | 2.1811  | 2202  | 1      | 0.0914     | 2.1811        | -0.0048 | 0.0157 | -0.0525   | 0.0138  |
| L10   | rs41147359      | 10  | 6108419   | G       | A       | 0.034  | -0.1497 | 0.0245 | -6.2245  | 0.2017 | 2.0923  | 1257  | 1      | 0.2017     | 2.0923        | -0.0094 | 0.0146 | -0.0764   | 0.0115  |
| L11   | rs76132426      | 10  | 62177462  | T       | G       | 0.1025 | 0.3369  | 0.0583 | 5.7787   | 0.9992 | 6.1704  | 106   | 1      | 0.9992     | 6.1704        | 0.0799  | 0.0146 | 0.0800    | 0.0145  |
| L11   | rs77523242      | 10  | 62395516  | C       | G       | 0.0623 | 0.3705  | 0.0635 | 5.8347   | 0.3548 | 2.8354  | 927   | 1      | 0.3548     | 2.8354        | 0.0551  | 0.0774 | 0.1554    | 0.0363  |
| L11   | rs10458646      | 10  | 62394760  | C       | T       | 0.1179 | 0.2024  | 0.0387 | 5.2300   | 0.3485 | 2.8236  | 923   | 1      | 0.6899     | 3.4425        | 0.0577  | 0.0666 | 0.1569    | 0.0287  |
| L11   | rs2028564       | 10  | 62384372  | G       | A       | 0.1406 | 0.0215  | 0.0341 | 6.0305   | 0.1629 | 2.3843  | 811   | 0.9948 | 0.5897     | 3.2528        | -0.0167 | 0.0383 | -0.1006   | 0.0234  |
| L11   | rs117040459     | 10  | 62508952  | A       | G       | 0.0367 | -0.0577 | 0.0647 | -0.8918  | 0.1438 | 2.3202  | 1371  | 1      | 0.2185     | 2.5418        | -0.0194 | 0.0494 | -0.1372   | 0.0348  |
| L11   | 10_62484667_C   | 10  | 62484667  | T       | C       | 0.1389 | 0.0016  | 0.0341 | 0.0469   | 0.1147 | 2.2075  | 1307  | 0.9951 | 0.2371     | 2.5878        | -0.0090 | 0.0259 | -0.0781   | 0.0213  |
| L11   | rs33738964      | 10  | 62490864  | T       | C       | 0.3802 | -0.2806 | 0.0254 | -7.5802  | 0.8900 | 4.2411  | 919   | 1      | 0.8900     | 4.2411        | -0.0326 | 0.0147 | -0.0496   | 0.0146  |
| L11   | rs689           | 11  | 2182224   | A       | T       | 0.2891 | -0.7004 | 0.0354 | -19.7853 | 0.9297 | 4.2715  | 996   | 1      | 1.0000     | 8.5680        | -0.1148 | 0.0350 | -0.1235   | 0.0156  |
| L12   | rs6356          | 11  | 2190951   | C       | T       | 0.3651 | -0.3058 | 0.0273 | -11.2015 | 0.9113 | 4.1613  | 1017  | 1      | 0.9798     | 4.8364        | -0.0740 | 0.0269 | -0.0812   | 0.0144  |
| L12   | rs4320932       | 11  | 2171601   | T       | C       | 0.2036 | -0.2123 | 0.0297 | -7.1482  | 0.2921 | 2.7655  | 962   | 1      | 0.3069     | 2.7960        | -0.0150 | 0.0243 | -0.0513   | 0.0266  |
| L12   | rs74918256      | 11  | 2161159   | G       | A       | 0.2186 | -0.1993 | 0.029  | -6.8724  | 0.0956 | 2.1739  | 940   | 0.9133 | 0.1112     | 2.2471        | -0.0046 | 0.0145 | -0.0476   | 0.0125  |
| L12   | rs10830227      | 11  | 88890822  | G       | A       | 0.4259 | -0.1582 | 0.0233 | -6.7897  | 1.0000 | 12.9259 | 648   | 1      | 1.0000     | 12.9259       | -0.1611 | 0.0198 | -0.1611   | 0.0198  |
| L12   | rs11018520      | 11  | 88903115  | T       | C       | 0.3422 | 0.0279  | 0.0248 | 1.1250   | 0.6715 | 3.2365  | 642   | 0.9329 | 0.9915     | 4.9927        | -0.0815 | 0.0592 | -0.1214   | 0.0195  |
| L12   | rs10830229      | 11  | 88891267  | A       | G       | 0.0852 | -0.0703 | 0.0426 | -1.6502  | 0.4419 | 2.8245  | 649   | 0.9089 | 0.7256     | 3.4644        | 0.0515  | 0.0599 | 0.1166    | 0.0228  |
| L12   | rs7724586       | 12  | 9848437   | A       | C       | 0.4033 | -0.1522 | 0.0265 | -5.7434  | 0.0848 | 2.0435  | 528   | 1      | 0.0848     | 2.0435        | -0.0032 | 0.0111 | -0.0382   | 0.0107  |
| L15   | rs75639074      | 12  | 56367901  | C       | G       | 0.067  | -0.0872 | 0.0481 | -1.8129  | 0.3586 | 2.4413  | 271   | 1      | 0.4434     | 2.5951        | -0.0256 | 0.0359 | -0.0715   | 0.0181  |
| L15   | rs1131017       | 12  | 56435929  | C       | G       | 0.4197 | 0.2461  | 0.0238 | 10.3403  | 0.3467 | 2.4187  | 395   | 1      | 0.7025     | 3.0670        | 0.0304  | 0.0426 | 0.0877    | 0.0149  |
| L16   | rs74094155      | 12  | 60965007  | G       | T       | 0.0065 | -0.8633 | 0.112  | -7.7080  | 0.9963 | 5.4574  | 867   | 1      | 0.9963     | 5.4574        | -0.5185 | 0.1254 | -0.5204   | 0.1216  |
| L16   | rs2654669       | 12  | 60984151  | C       | T       | 0.0206 | -0.088  | 0.0226 | -3.8938  | 0.3418 | 2.7383  | 930   | 1      | 0.3453     | 2.7451        | -0.0321 |        |           |         |
